# Supplementary material for: Efficacy and safety of enzyme replacement therapy with BMN 110 (elosulfase alfa) for Morquio A syndrome (mucopolysaccharidosis IVA): a phase 3 randomised placebo‐controlled study
Source: Springer Nature journal article supplement (doi:10.1007/s10545-014-9715-6), 2014-05-08

**Supportive online material 1:** Schematic representation of the study design

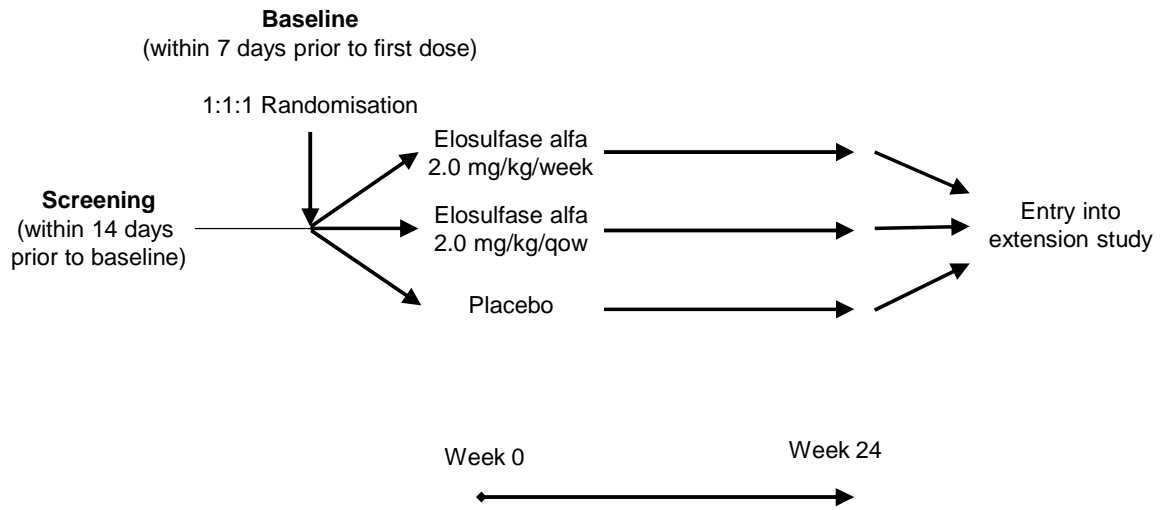

Supplement: MOESM1 [file 8835750]
