# Supplementary material for: Efficacy and safety of enzyme replacement therapy with BMN 110 (elosulfase alfa) for Morquio A syndrome (mucopolysaccharidosis IVA): a phase 3 randomised placebo‐controlled study
Source: Springer Nature journal article supplement (doi:10.1007/s10545-014-9715-6), 2014-05-08
Supplement: MOESM2 [file 8835750]

## Supportive online material 2: Baseline demographics and clinical characteristics

(Intent-to-Treat Population)

|                                             | Placebo          | Elosulfase alfa<br>2.0 mg/kg/qow | Elosulfase alfa<br>2.0 mg/kg/week |
|---------------------------------------------|------------------|----------------------------------|-----------------------------------|
| <b>Baseline demographics</b>                |                  |                                  |                                   |
| N                                           | 59               | 59                               | 58                                |
| Age at Enrolment (years)                    |                  |                                  |                                   |
| Mean (SD)                                   | 15.0 (11.30)     | 15.3 (10.79)                     | 13.1 (8.10)                       |
| Median (range)                              | 11.9 (5-57)      | 12.0 (5-49)                      | 11.1 (5-42)                       |
| Min - Max                                   | 5 - 57           | 5 - 49                           | 5 - 42                            |
| Age Group (years) <sup>a</sup>              |                  |                                  |                                   |
| 5 - 11                                      | 30 (50.8%)       | 31 (52.5%)                       | 32 (55.2%)                        |
| 12 - 18                                     | 15 (25.4%)       | 16 (27.1%)                       | 16 (27.6%)                        |
| ≥ 19                                        | 14 (23.7%)       | 12 (20.3%)                       | 10 (17.2%)                        |
| Sex                                         |                  |                                  |                                   |
| Female                                      | 32 (54.2%)       | 25 (42.4%)                       | 32 (55.2%)                        |
| Male                                        | 27 (45.8%)       | 34 (57.6%)                       | 26 (44.8%)                        |
| Race                                        |                  |                                  |                                   |
| Asian                                       | 11 (18.6%)       | 15 (25.4%)                       | 14 (24.1%)                        |
| Black or African American                   | 0                | 2 (3.4%)                         | 2 (3.4%)                          |
| White                                       | 44 (74.6%)       | 35 (59.3%)                       | 36 (62.1%)                        |
| Other                                       | 4 (6.8%)         | 7 (11.9%)                        | 6 (10.3%)                         |
| Ethnicity                                   |                  |                                  |                                   |
| Hispanic or Latino                          | 13 (22.0%)       | 16 (27.1%)                       | 9 (15.5%)                         |
| Other                                       | 46 (78.0%)       | 43 (72.9%)                       | 49 (84.5%)                        |
| <b>Baseline clinical characteristics</b>    |                  |                                  |                                   |
| 6MWT (meters)                               |                  |                                  |                                   |
| N                                           | 59               | 59                               | 58                                |
| Mean (SD)                                   | 211.9 (69.9)     | 205.7 (81.2)                     | 203.9 (76.3)                      |
| Median (range)                              | 228.9 (36-312)   | 218.0 (47-320)                   | 216.5 (42-322)                    |
| Walking aids used                           |                  |                                  |                                   |
| N                                           | 11 (18.6%)       | 16 (27.1%)                       | 9 (15.5%)                         |
| 3MSCT (stairs/minute)                       |                  |                                  |                                   |
| N                                           | 59               | 59                               | 58                                |
| Mean (SD)                                   | 30.0 (14.1)      | 27.1 (15.8)                      | 29.6 (16.4)                       |
| Median (range)                              | 30.8 (0-59)      | 25.5 (0-67)                      | 30.5 (0-72)                       |
| Normalised urine KS <sup>b</sup><br>(µg/mg) |                  |                                  |                                   |
| N                                           | 58               | 59                               | 58                                |
| Mean (SD)                                   | 25.7 (15.1)      | 28.6 (21.2)                      | 26.9 (14.1)                       |
| Median (range)                              | 26.7 (2-53)      | 27.4 (2-117)                     | 24.1 (2-59)                       |
| MVV (L/min)                                 |                  |                                  |                                   |
| N                                           | 51               | 53                               | 52                                |
| Mean (SD)                                   | 34.8 (27.3)      | 32.8 (20.0)                      | 28.3 (16.6)                       |
| Median (range)                              | 27.0 (7.0-129.0) | 26.8 (10.0-91.1)                 | 25.0 (5.0-76.0)                   |

|                             | <b>Placebo</b>   | <b>Elosulfase alfa<br/>2.0 mg/kg/qow</b> | <b>Elosulfase alfa<br/>2.0 mg/kg/week</b> |
|-----------------------------|------------------|------------------------------------------|-------------------------------------------|
| <b>FVC (L)</b>              |                  |                                          |                                           |
| N                           | 54               | 55                                       | 56                                        |
| Mean (SD)                   | 1.2 (0.9)        | 1.1 (0.7)                                | 0.9 (0.5)                                 |
| Median (range)              | 0.9 (0.3-5.0)    | 0.9 (0.3-3.0)                            | 0.8 (0.3-3.0)                             |
| <b>Standing height (cm)</b> |                  |                                          |                                           |
| N                           | 58               | 59                                       | 58                                        |
| Mean (SD)                   | 105.5            | 104.6                                    | 101.3                                     |
| Median (range)              | 100.0 (86 – 165) | 100.2 (81 – 147)                         | 98.8 (83 – 141)                           |

3MSCT: 3-minute stair climb test; 6MWT: 6-minute walk test; FVC: forced vital capacity;  
 KS: keratan sulfate; MVV: maximum voluntary ventilation; qow: every other week; SD,  
 standard deviation

<sup>a</sup> Stratification Factor; <sup>b</sup> normalized urine KS is calculated as urine keratan sulfate divided by  
 urine creatinine
