# Supplementary material for: Efficacy and safety of enzyme replacement therapy with BMN 110 (elosulfase alfa) for Morquio A syndrome (mucopolysaccharidosis IVA): a phase 3 randomised placebo‐controlled study
Source: Springer Nature journal article supplement (doi:10.1007/s10545-014-9715-6), 2014-05-08
Supplement: MOESM3 [file 8835750]

**Supportive online material 3:** Medical history by treatment group: incidence  $\geq$  20% in any of the treatment groups by Preferred Term (Intent-to-Treat population)

| <b>Preferred Term</b>                                                     | <b>Placebo<br/>(N = 59)</b> | <b>Elosulfase alfa<br/>2.0 mg/kg/qow<br/>(N = 59)</b> | <b>Elosulfase alfa<br/>2.0 mg/kg/week<br/>(N = 58)</b> |
|---------------------------------------------------------------------------|-----------------------------|-------------------------------------------------------|--------------------------------------------------------|
| <b>Subjects with at least one reported medical history finding, n (%)</b> | 58 (98.3%)                  | 58 (98.3%)                                            | 58 (100.0%)                                            |
| Corneal opacity, n (%)                                                    | 30 (50.8%)                  | 34 (57.6%)                                            | 30 (51.7%)                                             |
| Knee deformity, n (%)                                                     | 26 (44.1%)                  | 33 (55.9%)                                            | 32 (55.2%)                                             |
| Pectus carinatum, N (%)                                                   | 23 (39.0%)                  | 25 (42.4%)                                            | 27 (46.6%)                                             |
| Tricuspid valve incompetence, n (%)                                       | 20 (33.9%)                  | 15 (25.4%)                                            | 13 (22.4%)                                             |
| Kyphosis, n (%)                                                           | 18 (30.5%)                  | 19 (32.2%)                                            | 17 (29.3%)                                             |
| Body height below normal, n (%)                                           | 17 (28.8%)                  | 23 (39.0%)                                            | 12 (20.7%)                                             |
| Spinal fusion surgery, n (%)                                              | 15 (25.4%)                  | 12 (20.3%)                                            | 12 (20.7%)                                             |
| Dysmorphism, n (%)                                                        | 13 (22.0%)                  | 14 (23.7%)                                            | 9 (15.5%)                                              |
| Hip dysplasia, n (%)                                                      | 11 (18.6%)                  | 11 (18.6%)                                            | 16 (27.6%)                                             |
| Arthralgia, n (%)                                                         | 11 (18.6%)                  | 10 (16.9%)                                            | 14 (24.1%)                                             |
| Ear tube insertion, n (%)                                                 | 11 (18.6%)                  | 12 (20.3%)                                            | 12 (20.7%)                                             |
| Knee operation, n (%)                                                     | 11 (18.6%)                  | 10 (16.9%)                                            | 9 (15.5%)                                              |
| Tooth malformation, n (%)                                                 | 11 (18.6%)                  | 13 (22.0%)                                            | 9 (15.5%)                                              |
| Bone deformity, n (%)                                                     | 9 (15.3%)                   | 12 (20.3%)                                            | 13 (22.4%)                                             |

qow: every other week.

MedDRA version 15.0

Subjects who experienced more than one finding within a MedDRA category were counted once within that category.
