# Supplementary material for: Efficacy and safety of enzyme replacement therapy with BMN 110 (elosulfase alfa) for Morquio A syndrome (mucopolysaccharidosis IVA): a phase 3 randomised placebo‐controlled study
Source: Springer Nature journal article supplement (doi:10.1007/s10545-014-9715-6), 2014-05-08
Supplement: MOESM4 [file 8835750]

**Supportive online material 4:** Descriptive summary of 6-minute walk test

(observed case). Intent-to-treat population

| <b>6-Minute Walk Test (meters)</b>    | <b>Placebo<br/>(N = 59)</b> | <b>Elosulfase alfa<br/>2.0 mg/kg/qow<br/>(N = 59)</b> | <b>Elosulfase alfa<br/>2.0 mg/kg/week<br/>(N = 58)</b> |
|---------------------------------------|-----------------------------|-------------------------------------------------------|--------------------------------------------------------|
| <b>Baseline</b>                       |                             |                                                       |                                                        |
| n                                     | 59                          | 59                                                    | 58                                                     |
| Mean (SD)                             | 211.9 (69.9)                | 205.7 (81.2)                                          | 203.9 (76.3)                                           |
| Median                                | 228.9                       | 218.0                                                 | 216.5                                                  |
| Min, Max                              | 36.2, 312.2                 | 47.1, 319.6                                           | 42.4, 321.5                                            |
| <b>Week 12</b>                        |                             |                                                       |                                                        |
| n                                     | 59                          | 59                                                    | 58                                                     |
| Mean (SD)                             | 224.6 (78.5)                | 219.1 (78.4)                                          | 227.6 (76.4)                                           |
| Median                                | 231.3                       | 232.1                                                 | 237.1                                                  |
| Min, Max                              | 51.5, 431.5                 | 54.7, 377.3                                           | 48.6, 350.7                                            |
| <b>Week 24</b>                        |                             |                                                       |                                                        |
| n                                     | 59                          | 58                                                    | 57                                                     |
| Mean (SD)                             | 225.4 (83.2)                | 220.5 (88.2)                                          | 243.3 (83.5)                                           |
| Median                                | 229.4                       | 238.1                                                 | 251.0                                                  |
| Min, Max                              | 50.6, 501.0                 | 44.1, 370.4                                           | 52.0, 399.9                                            |
| <b>Week 12 - Change from Baseline</b> |                             |                                                       |                                                        |
| n                                     | 59                          | 59                                                    | 58                                                     |
| Mean (SD)                             | 12.7 (35.8)                 | 13.5 (38.4)                                           | 23.7 (42.2)                                            |
| Median                                | 11.4                        | 13.6                                                  | 21.4                                                   |
| Min, Max                              | -70.9, 137.0                | -102.5, 106.8                                         | -86.4, 171.0                                           |
| <b>Week 24 - Change from Baseline</b> |                             |                                                       |                                                        |
| n                                     | 59                          | 58                                                    | 57                                                     |
| Mean (SD)                             | 13.5 (50.6)                 | 14.9 (40.8)                                           | 36.5 (58.5)                                            |
| Median                                | 9.9                         | 16.1                                                  | 20.0                                                   |
| Min, Max                              | -99.2, 220.5                | -105.9, 114.2                                         | -57.8, 228.7                                           |

qow: every other week; SD: standard deviation
