# Supplementary material for: Efficacy and safety of enzyme replacement therapy with BMN 110 (elosulfase alfa) for Morquio A syndrome (mucopolysaccharidosis IVA): a phase 3 randomised placebo‐controlled study
Source: Springer Nature journal article supplement (doi:10.1007/s10545-014-9715-6), 2014-05-08
Supplement: MOESM5 [file 8835750]

**Supportive online material 5:** ANCOVA of 6-minute walk test change from baseline to week 24: summary of subgroup by treatment interaction analysis. Intent to treat population

|                                                                                   | <b>Estimate</b> | <b>95% CI</b>  | <b>P-value</b> |
|-----------------------------------------------------------------------------------|-----------------|----------------|----------------|
| <b>Baseline 6MWT category</b>                                                     |                 |                |                |
| Elosulfase alfa 2.0 mg/kg/qow vs placebo (6MWT ≤ 200 meters)                      | 5.03            | (-23.97,34.04) |                |
| Elosulfase alfa 2.0 mg/kg/qow vs placebo (6MWT > 200 meters)                      | -2.19           | (-25.79,21.41) |                |
| Elosulfase alfa 2.0 mg/kg/qow vs placebo (6MWT > 200 meters - 6MWT ≤ 200 meters)  | -7.22           | (-44.60,30.16) | 0.7034         |
| Elosulfase alfa 2.0 mg/kg/week vs placebo (6MWT ≤ 200 meters)                     | 40.38           | (11.00,69.76)  |                |
| Elosulfase alfa 2.0 mg/kg/week vs placebo (6MWT > 200 meters)                     | 10.84           | (-12.76,34.44) |                |
| Elosulfase alfa 2.0 mg/kg/week vs placebo (6MWT > 200 meters - 6MWT ≤ 200 meters) | -29.54          | (-67.18,8.10)  | 0.1232         |
| <b>Age group at baseline</b>                                                      |                 |                |                |
| Elosulfase alfa 2.0 mg/kg/qow vs placebo (Age 5-11)                               | -11.67          | (-37.19,13.85) |                |
| Elosulfase alfa 2.0 mg/kg/qow vs placebo (Age 12-18)                              | 23.77           | (-12.01,59.56) |                |
| Elosulfase alfa 2.0 mg/kg/qow vs placebo (Age ≥ 19)                               | 2.34            | (-36.83,41.50) |                |
| Elosulfase alfa 2.0 mg/kg/qow vs placebo (Age 12-18 - Age 5-11)                   | 35.45           | (-8.50,79.39)  | 0.1132         |
| Elosulfase alfa 2.0 mg/kg/qow vs placebo (Age ≥ 19 - Age 5-11)                    | 14.01           | (-32.74,60.75) | 0.5549         |
| Elosulfase alfa 2.0 mg/kg/week vs placebo (Age 5-11)                              | 13.76           | (-11.54,39.07) |                |
| Elosulfase alfa 2.0 mg/kg/week vs placebo (Age 12-18)                             | 48.22           | (12.44,84.01)  |                |
| Elosulfase alfa 2.0 mg/kg/week vs placebo (Age ≥ 19)                              | 10.43           | (-30.94,51.80) |                |
| Elosulfase alfa 2.0 mg/kg/week vs placebo (Age 12-18 - Age 5-11)                  | 34.46           | (-9.36,78.29)  | 0.1224         |
| Elosulfase alfa 2.0 mg/kg/week vs placebo (Age ≥ 19 - Age 5-11)                   | -3.34           | (-51.83,45.15) | 0.8921         |

|                                                                    | <b>Estimate</b> | <b>95% CI</b>  | <b>P-value</b> |        |
|--------------------------------------------------------------------|-----------------|----------------|----------------|--------|
| <b>Sex</b>                                                         |                 |                |                |        |
| Elosulfase alfa 2.0 mg/kg/qow vs placebo (Male)                    | 6.81            | (-19.15,32.76) | 0.5197         |        |
| Elosulfase alfa 2.0 mg/kg/qow vs placebo (Female)                  | -5.42           | (-32.22,21.39) |                |        |
| Elosulfase alfa 2.0 mg/kg/qow vs placebo (Female - Male)           | -12.22          | (-49.62,25.18) |                |        |
| Elosulfase alfa 2.0 mg/kg/week vs placebo (Male)                   | 27.27           | (-0.34,54.89)  |                |        |
| Elosulfase alfa 2.0 mg/kg/week vs placebo (Female)                 | 18.39           | (-6.75,43.52)  |                |        |
| Elosulfase alfa 2.0 mg/kg/week vs placebo (Female - Male)          | -8.89           | (-46.21,28.43) |                | 0.6388 |
| <b>Race</b>                                                        |                 |                |                |        |
| Elosulfase alfa 2.0 mg/kg/qow vs placebo (White)                   | -5.94           | (-28.28,16.40) | 0.3168         |        |
| Elosulfase alfa 2.0 mg/kg/qow vs placebo (Non-White)               | 14.11           | (-18.39,46.61) |                |        |
| Elosulfase alfa 2.0 mg/kg/qow vs placebo (Non-White - White)       | 20.05           | (-19.38,59.48) |                |        |
| Elosulfase alfa 2.0 mg/kg/week vs placebo (White)                  | 31.45           | (9.30,53.61)   |                |        |
| Elosulfase alfa 2.0 mg/kg/week vs placebo (Non-White)              | 11.23           | (-21.91,44.37) |                |        |
| Elosulfase alfa 2.0 mg/kg/week vs placebo (Non-White - White)      | 20.22           | (-60.06,19.61) |                | 0.3176 |
| <b>Region</b>                                                      |                 |                |                |        |
| Elosulfase alfa 2.0 mg/kg/qow vs placebo (North America)           | 8.97            | (-26.77,44.72) | 0.4933         |        |
| Elosulfase alfa 2.0 mg/kg/qow vs placebo (Europe)                  | -7.27           | (-36.59,22.05) |                |        |
| Elosulfase alfa 2.0 mg/kg/qow vs placebo (Other)                   | 3.60            | (-29.16,36.36) |                |        |
| Elosulfase alfa 2.0 mg/kg/qow vs placebo (Europe - North America)  | -16.24          | (-62.96,30.47) |                | 0.8271 |
| Elosulfase alfa 2.0 mg/kg/qow vs placebo (Other - North America)   | -5.37           | (-53.88,43.13) |                |        |
| Elosulfase alfa 2.0 mg/kg/week vs placebo (North America)          | 42.63           | (5.88,79.37)   |                |        |
| Elosulfase alfa 2.0 mg/kg/week vs placebo (Europe)                 | 23.51           | (-4.59,51.61)  | 0.4228         |        |
| Elosulfase alfa 2.0 mg/kg/week vs placebo (Other)                  | 4.67            | (-29.64,38.98) |                |        |
| Elosulfase alfa 2.0 mg/kg/week vs placebo (Europe - North America) | -19.11          | (-66.09,27.86) |                |        |
| Elosulfase alfa 2.0 mg/kg/week vs placebo (Other - North America)  | -37.95          | (-88.40,12.50) |                | 0.1393 |
