# Supplementary material for: Efficacy and safety of enzyme replacement therapy with BMN 110 (elosulfase alfa) for Morquio A syndrome (mucopolysaccharidosis IVA): a phase 3 randomised placebo‐controlled study
Source: Springer Nature journal article supplement (doi:10.1007/s10545-014-9715-6), 2014-05-08

**Supportive online material 6:** Mean change from baseline over time in stairs/min climbed

in a 3-minute stair climb test (3MSCT) (model-based repeated measures ANCOVA).

Error bars represent 95% CI of least squared mean change from baseline.

\**P*-value vs. placebo

qow; every other week

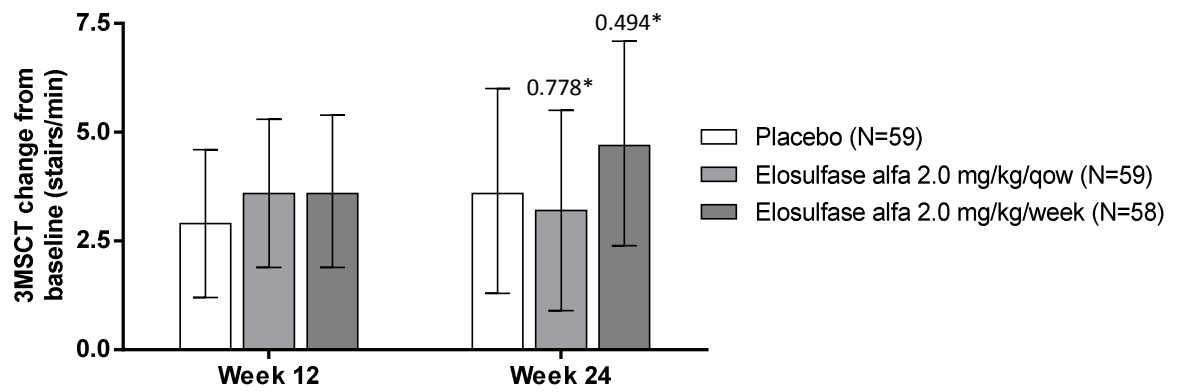

Supplement: MOESM6 [file 8835750]
