# Supplementary material for: Efficacy and safety of enzyme replacement therapy with BMN 110 (elosulfase alfa) for Morquio A syndrome (mucopolysaccharidosis IVA): a phase 3 randomised placebo‐controlled study
Source: Springer Nature journal article supplement (doi:10.1007/s10545-014-9715-6), 2014-05-08
Supplement: MOESM7 [file 8835750]

**Supportive online material 7:** The effect of elosulfase alfa on primary, secondary, and tertiary efficacy endpoints (intent-to-treat population).

Modelled treatment effect, defined as (change from baseline to week 24, elosulfase alfa) – (change from baseline to week 24, Placebo)

| Modeled treatment effect <sup>a</sup>                                 | 2.0 mg/kg/qow vs. Placebo (N = 59 vs. 59) | 2.0 mg/kg/week vs. Placebo (N = 58 vs. 59) |
|-----------------------------------------------------------------------|-------------------------------------------|--------------------------------------------|
| <b>Primary outcome</b>                                                |                                           |                                            |
| <b>6MWT distance</b> (meters change from BL)                          |                                           |                                            |
| LS Mean difference (95% CI)                                           | 0.5 (-17.8, 18.9)                         | 22.5 (4.0, 40.9)                           |
| <i>P-value</i> <sup>b</sup>                                           | 0.954                                     | 0.017                                      |
| <b>Secondary outcome</b>                                              |                                           |                                            |
| <b>3MSCT</b> (stairs/min change from BL)                              |                                           |                                            |
| LS Mean difference (95% CI)                                           | -0.5 (-3.7, 2.8)                          | 1.1 (-2.1, 4.4)                            |
| <i>P-value</i> <sup>c</sup>                                           | 0.778                                     | 0.494                                      |
| <b>Normalised urine KS</b> (% change from BL)                         |                                           |                                            |
| LS Mean difference (95% CI)                                           | -30.2 (-38.5, -22.0)                      | -40.7 (-49.0, -32.4)                       |
| <i>P-value</i> <sup>d</sup>                                           | <0.001                                    | <0.001                                     |
| <b>Tertiary outcome</b>                                               |                                           |                                            |
| <b>MVV</b> (% change from BL)                                         |                                           |                                            |
| LS Mean difference (95% CI)                                           | 3.4 (-9.9, 16.6)                          | 10.3 (-1.8, 22.4)                          |
| <i>P-value</i> <sup>e</sup>                                           | 0.611                                     | 0.094                                      |
| <b>6MWD/3MSC/MVV Composite z-score</b> (change from BL)               |                                           |                                            |
| LS Mean difference (95% C)                                            | 0.0 (-0.1, 0.2)                           | 0.1 (-0.0, 0.3)                            |
| <i>P-value</i> <sup>f</sup>                                           | 0.882                                     | 0.053                                      |
| <b>FVC</b> (% change from BL)                                         |                                           |                                            |
| LS Mean difference (95% CI)                                           | 3.0 (-2.4, 8.3)                           | 3.3 (-3.1, 9.6)                            |
| <i>P-value</i> <sup>g</sup>                                           | 0.275                                     | 0.304                                      |
| <b>FEV<sub>1</sub></b> (% change from BL)                             |                                           |                                            |
| LS Mean difference (95% CI)                                           | 0.2 (-7.4, 7.9)                           | 1.8 (-5.5, 9.2)                            |
| <i>P-value</i> <sup>h</sup>                                           | 0.955                                     | 0.613                                      |
| <b>MPS HAQ</b>                                                        |                                           |                                            |
| <b>Self care domain<sup>m</sup> score</b> (change from BL)            |                                           |                                            |
| LS Mean difference (95% CI)                                           | -0.1 (-0.5, 0.3)                          | 0.1 (-0.3, 0.5)                            |
| <i>P-value</i> <sup>i</sup>                                           | 0.724                                     | 0.737                                      |
| <b>Caregiver assistance domain<sup>m</sup> score</b> (change from BL) |                                           |                                            |
| LS Mean difference (95% CI)                                           | -0.4 (-2.4, 1.6)                          | -0.9 (-2.8, 1.1)                           |
| <i>P-value</i> <sup>j</sup>                                           | 0.679                                     | 0.399                                      |
| <b>Mobility domain<sup>n</sup> score</b> (change from BL)             |                                           |                                            |
| LS Mean difference (95% CI)                                           | -0.3 (-0.8, 0.2)                          | -0.3 (-0.8, 0.3)                           |
| <i>P-value</i> <sup>k</sup>                                           | 0.261                                     | 0.336                                      |
| <b>Anthropometric measures</b>                                        |                                           |                                            |
| <b>Standing height z-score<sup>o</sup></b> (change from BL)           |                                           |                                            |
| LS Mean difference (95%CI)                                            | 0.1 (-0.1, 0.3)                           | 0.1 (-0.0, 0.3)                            |
| <i>P-valuk</i>                                                        | 0.222                                     | 0.115                                      |
| <b>Growth rate z-score<sup>o</sup></b> (change from BL)               |                                           |                                            |
| LS Mean difference (95% CI)                                           | 0.4 (-0.1, 0.9)                           | 0.4 (-0.1, 0.9)                            |
| <i>P-value</i> <sup>m</sup>                                           | 0.138                                     | 0.103                                      |

3MSCT: 3-minute stair climb test; 6MWT: 6-minute walk test; BL: baseline; CI: confidence interval; FVC: forced vital capacity; HAQ: health assessment questionnaire; KS: keratan sulfate; LS Mean: least

squares mean; MPS: mucopolysaccharidosis; MVV: maximum voluntary ventilation; qow: every other week

<sup>a</sup>Treatment effect defined as (change from baseline to week 24, elosulfase alfa) – (change from baseline to week 24, placebo)

<sup>b</sup>*P*-value determined by t-test from ANCOVA model (primary endpoint analysis), adjusted for baseline covariates: age group and 6-minute walk test (6MWT) category

<sup>c</sup>*P*-value determined by t-test ANCOVA model adjusted for baseline covariates: age group, 6MWT category, and continuous 3-minute stair climb test

<sup>d</sup>*P*-value determined by t-test ANCOVA model adjusted for baseline covariates: age group, 6MWT category, and normalized urine KS

<sup>e-m</sup> *P*-value determined by t-test from ANCOVA model adjusted for baseline covariates: age group, 6MWT category, and respectively MVV<sup>e</sup>, composite score<sup>f</sup>, FVC<sup>g</sup>, FEV<sub>1</sub><sup>h</sup>, MPS HAQ Self care domain score<sup>i</sup>, MPS HAQ Caregiver assistance domain score<sup>j</sup>, MPS HAQ Mobility domain score<sup>k</sup>, standing height<sup>l</sup>, and growth rate<sup>m</sup>

<sup>n</sup>MPS HAQ domain scores range from 0 to 20; decreases in domain scores (negative values) indicate improvement

<sup>o</sup>The normalised standing height (scaled as a z score) computed using CDC normals was explored in males ≤18 years and females ≤15 years; the combined historical and on study normalized standard height z scores were used to compute growth rate change (scaled as z-score)

Tertiary variables that were analysed differently from those included in the table are discussed in the text
